# Supplementary material
Source: PubMed Central journal article supplement (PMC3973065)
Supplement: 13238_2013_11_MOESM1_ESM.pdf [file 13238_2013_11_MOESM1_ESM.pdf]

Supplementary Table1. List of primers employed in this study

| Gene   | 5'oligo                  | 3'oligo                  |
|--------|--------------------------|--------------------------|
| Best1  | CTGGGCTTCTACGTGACGC      | AGGTTCTCGTACTGGTTCCAC    |
| cMyc   | CGGGCGGGCACTTTG          | GGAGAGTCGCGTCCTTGCT      |
| CRALBP | AAGCTGGCTACCCTGGTGT      | TGAAGCAATATGCCTGCAAGA    |
| Crx    | GCCCCACTATTCTGTCAACG     | GTCTGGGTACTGGGTCTTGG     |
| GAPDH  | GGAATCATGACCACAGTCCATGCC | TCAGGGATGACCTTGCCACAG    |
| Klf4   | AGCCTAATTGATGGTGCTTGGT   | TTGAAAACCTTTGGCTTCCTTGTT |
| Lhx2   | ATGCTGTTCCACAGTCTGTCTG   | GCATGGTTCGTCTCGGTGTC     |
| Mitf   | TGGTTTTCCACGAGCTATTTT    | GCACAGAGTCAATTTCTGGT     |
| Nrl    | GGCTCCACACCTTACAGCTC     | GGCCCATCAACAGGGACTG      |
| Otx2   | CAAAGTGAGACCTGCCAAAAGA   | TGGACAAGGGATCTGACAGTG    |
| Pax6   | AGTGAATCAGCTCGGTGGTGTCTT | TGCAGAATTCGGGAAATGTCGCAC |
| Pedf   | TTCAAAGTCCCCGTGAACAAG    | GAGAGCCCGGTGAATGATGG     |
| Rax    | GAATCTCGAAATCTCAGCCC     | CTTCACTAATTTGCTCAGGAC    |
| Rpe65  | CCTGCTGGTGGTTACAAGAAA    | CCTGCCTGTTACATGAGCTGT    |
| Six3   | CAAGGAGTCTCACGGCAAG      | GCAATGCGTCTTCTGCTCG      |
| Six6   | GCCCTCAACAAGAATGAGTCG    | GCCTCCTGGTAGTGTGCTTC     |
| Tyr    | TGCACAGAGAGACGACTCTTG    | GAGCTGATGGTATGCTTTGCTAA  |
| Tyrp2  | AACTGCGAGCGGAAGAAACC     | CGTAGTCGGGGTGTACTCTCT    |
